# Supplementary material for: Multiplexed transcriptional repression identifies a network of bactericidal interactions between mycobacterial respiratory complexes
Source: PubMed Central journal article supplement — iScience. 2021 Dec 4;25(1):103573. doi: 10.1016/j.isci.2021.103573 (PMC8692989; doi:10.1016/j.isci.2021.103573), 2021-12-04
Supplement: mmc1.pdf [file mmc1.pdf]

iScience, Volume 25

**Supplemental information**

**Multiplexed transcriptional repression identifies  
a network of bactericidal interactions  
between mycobacterial respiratory complexes**

**Matthew B. McNeil, Heath W. Ryburn, Justin Tirados, Chen-Yi Cheung, and Gregory M. Cook**

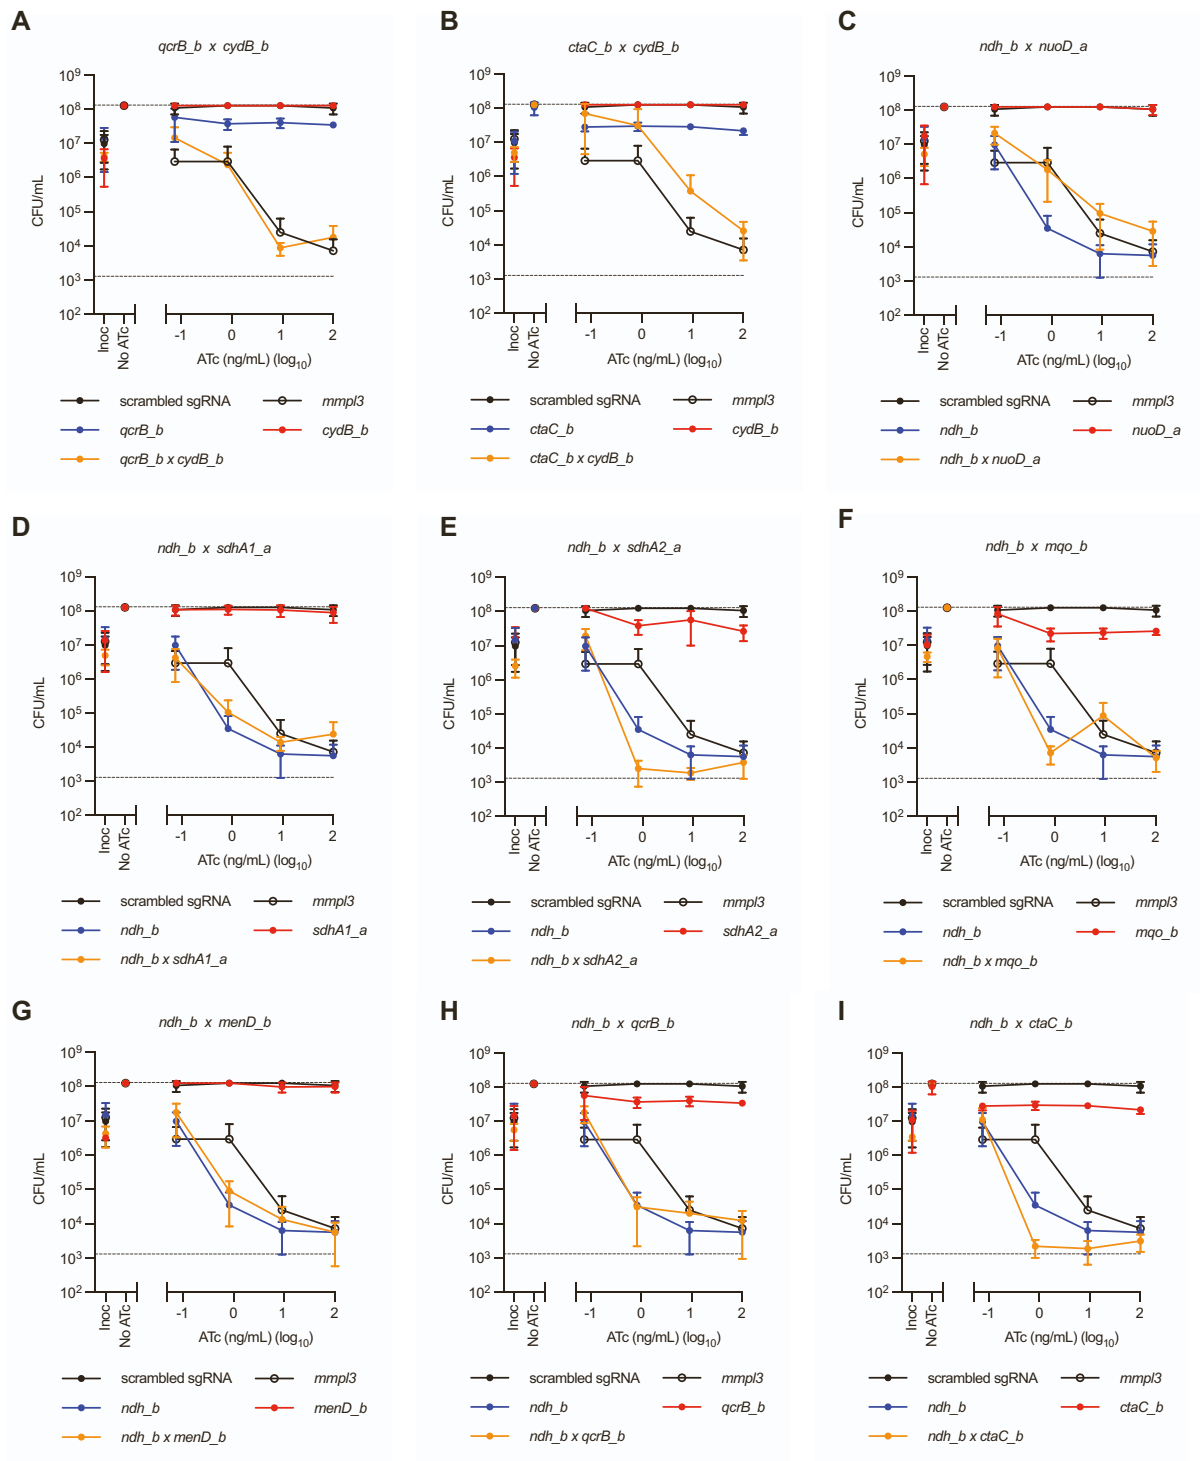

1

2 **Figure S1| Killing phenotypes of multiplexed, related to figure 1: CFU/ml plots of**  
 3 *M. smegmatis* strains expressing stated single and multiplexed sgRNAs. A strain  
 4 expressing a non-targeting (NT) sgRNA or sgRNA targeting *mmpL3* is used as a  
 5 negative and positive control respectively. Results are the mean  $\pm$  SD of four biological  
 6 replicates

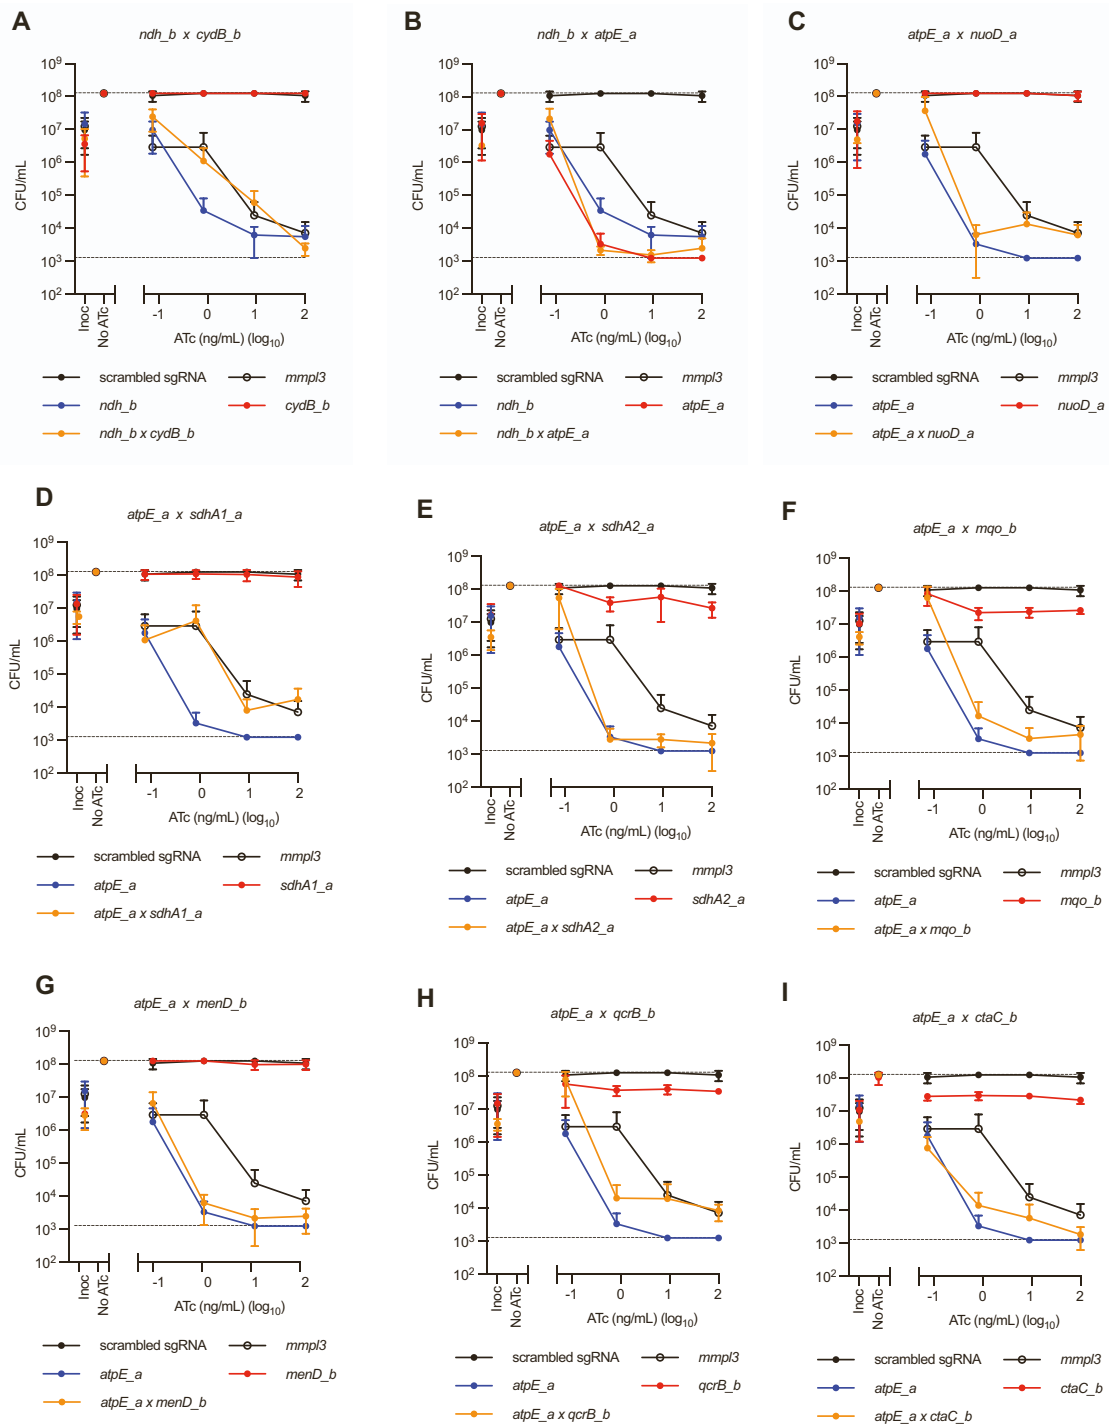

7

8 **Figure S2| Killing phenotypes of multiplexed, related to figure 1: CFU/ml plots of**

9 *M. smegmatis* strains expressing stated single and multiplexed sgRNAs. A strain  
 10 expressing a non-targeting (NT) sgRNA or sgRNA targeting *mmpL3* is used as a  
 11 negative and positive control respectively. Results are the mean  $\pm$  SD of four biological  
 12 replicates

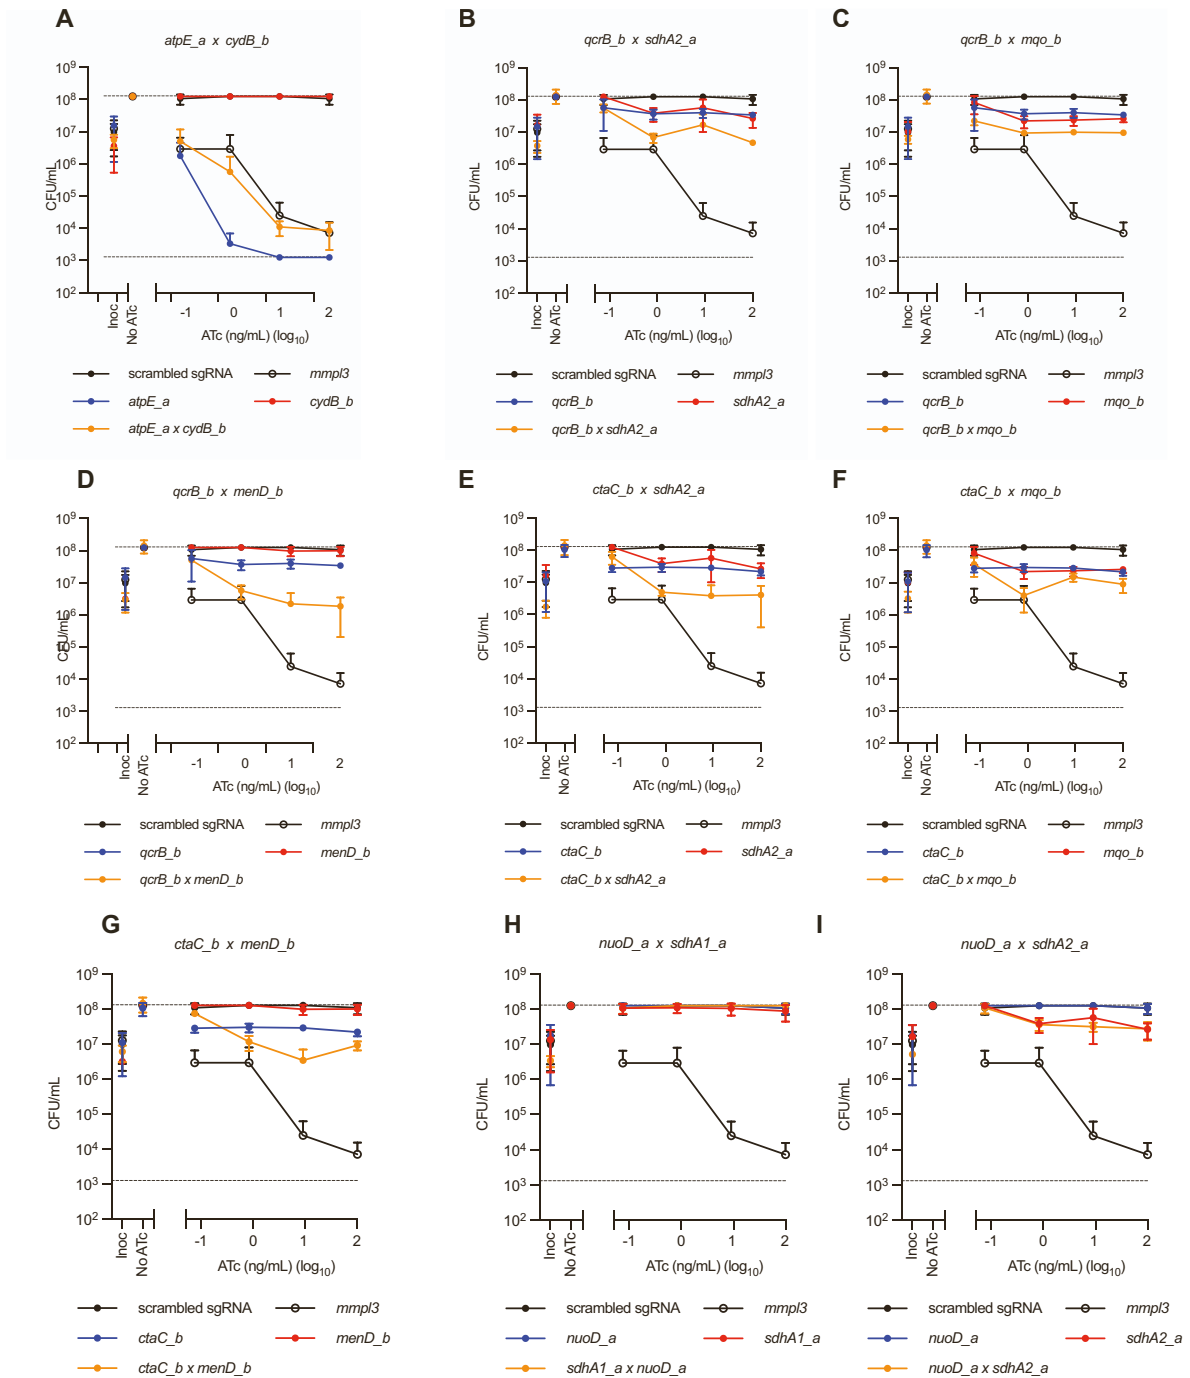

13

14 **Figure S3| Killing phenotypes of multiplexed, related to figure 1: CFU/ml plots of**

15 *M. smegmatis* strains expressing stated single and multiplexed sgRNAs. A strain

16 expressing a non-targeting (NT) sgRNA or sgRNA targeting *mmpL3* is used as a

17 negative and positive control respectively. Results are the mean  $\pm$  SD of four biological

18 replicates

19

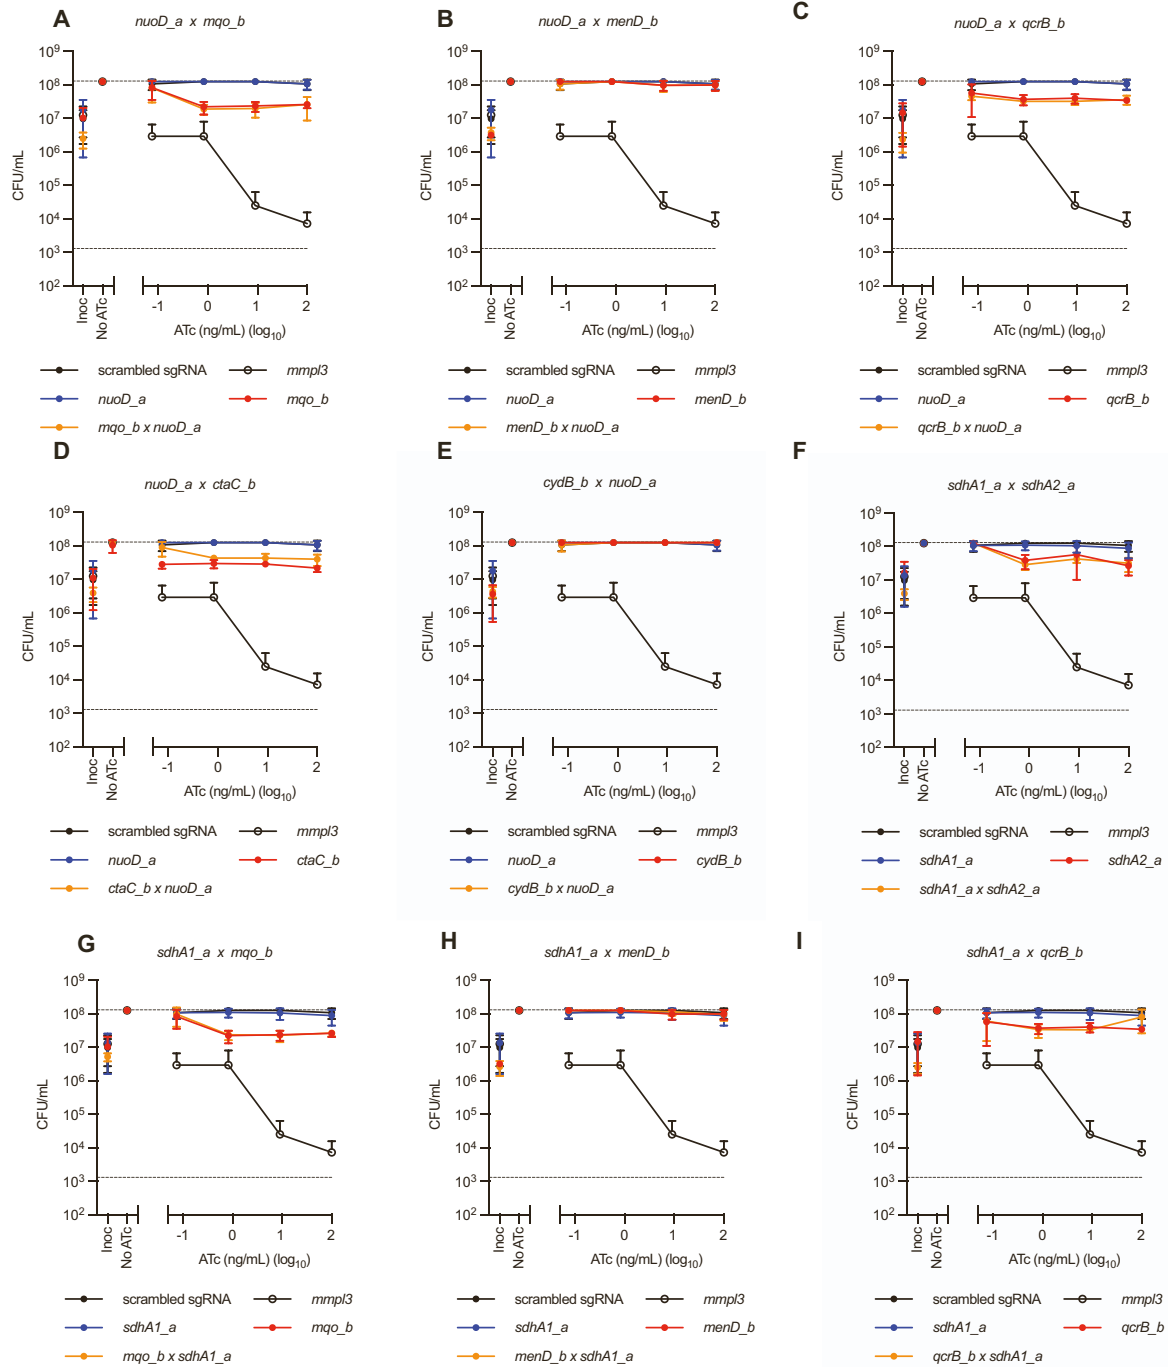

20

21 **Figure S4| Killing phenotypes of multiplexed, related to figure 1: CFU/ml plots of**  
 22 *M. smegmatis* strains expressing stated single and multiplexed sgRNAs. A strain  
 23 expressing a non-targeting (NT) sgRNA or sgRNA targeting *mmpL3* is used as a  
 24 negative and positive control respectively. Results are the mean  $\pm$  SD of four biological  
 25 replicates

26

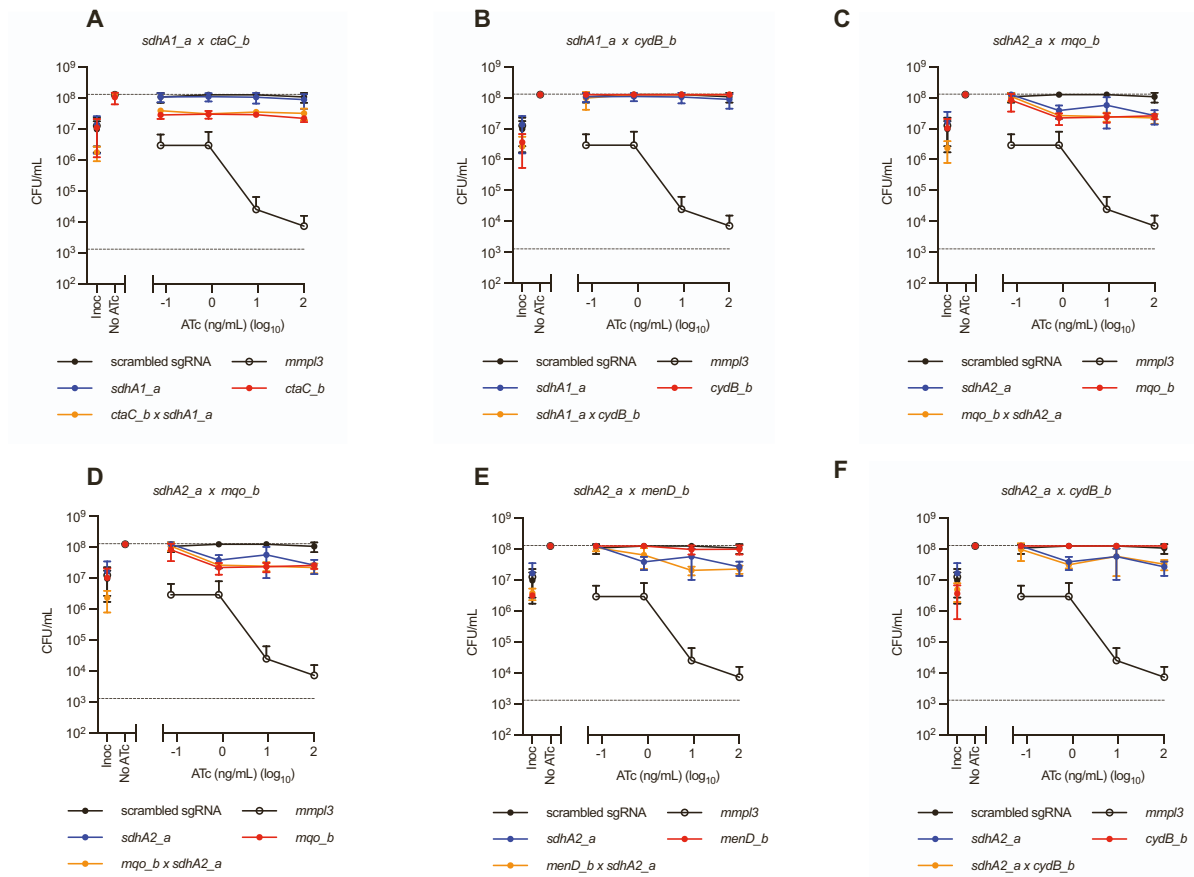

27

28 **Figure S5| Killing phenotypes of multiplexed, related to figure 1: CFU/ml plots of**  
 29 *M. smegmatis* strains expressing stated single and multiplexed sgRNAs. A strain  
 30 expressing a non-targeting (NT) sgRNA or sgRNA targeting *mmpL3* is used as a  
 31 negative and positive control respectively. Results are the mean  $\pm$  SD of four biological  
 32 replicates

33

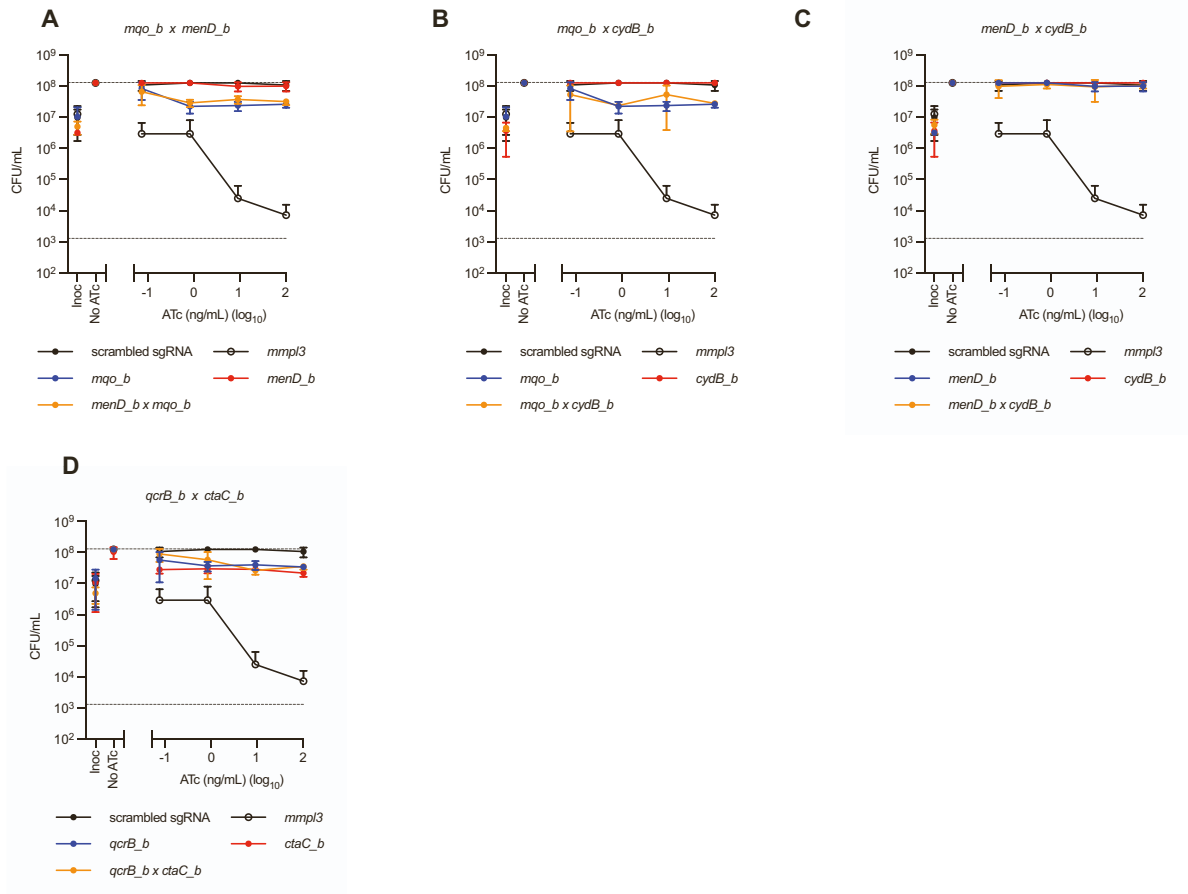

34

35 **Figure S6| Killing phenotypes of multiplexed, related to figure 1:** CFU/ml plots of  
 36 *M. smegmatis* strains expressing stated single and multiplexed sgRNAs. A strain  
 37 expressing a non-targeting (NT) sgRNA or sgRNA targeting *mmpL3* is used as a  
 38 negative and positive control respectively. Results are the mean  $\pm$  SD of four biological  
 39 replicates

40

41

42

43

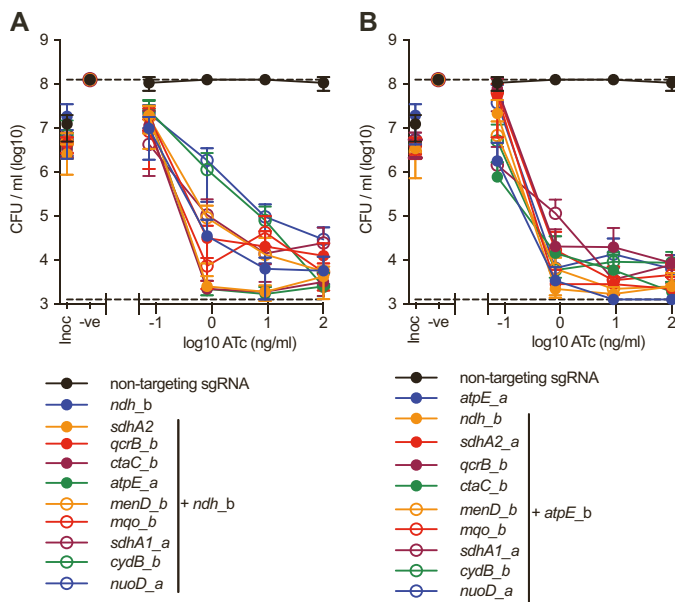

44

45

46 **Figure S7| Killing phenotypes of sgRNAs targeting *ndh* and *atpE* in multiplexed**

47 **combinations, related to figure 2: (A-B) CFU/ml plots of *M. smegmatis* strains**

48 **expressing (A) *ndh\_b* or (B) *atpE\_a* in combination with sgRNAs targeting alternative**

49 **respiratory components across increasing concentrations of ATc. A strain expressing**

50 **a non-targeting (NT) sgRNA is used as a negative control. Results for A-D are the**

51 **mean  $\pm$  SD of four biological replicates.**

52



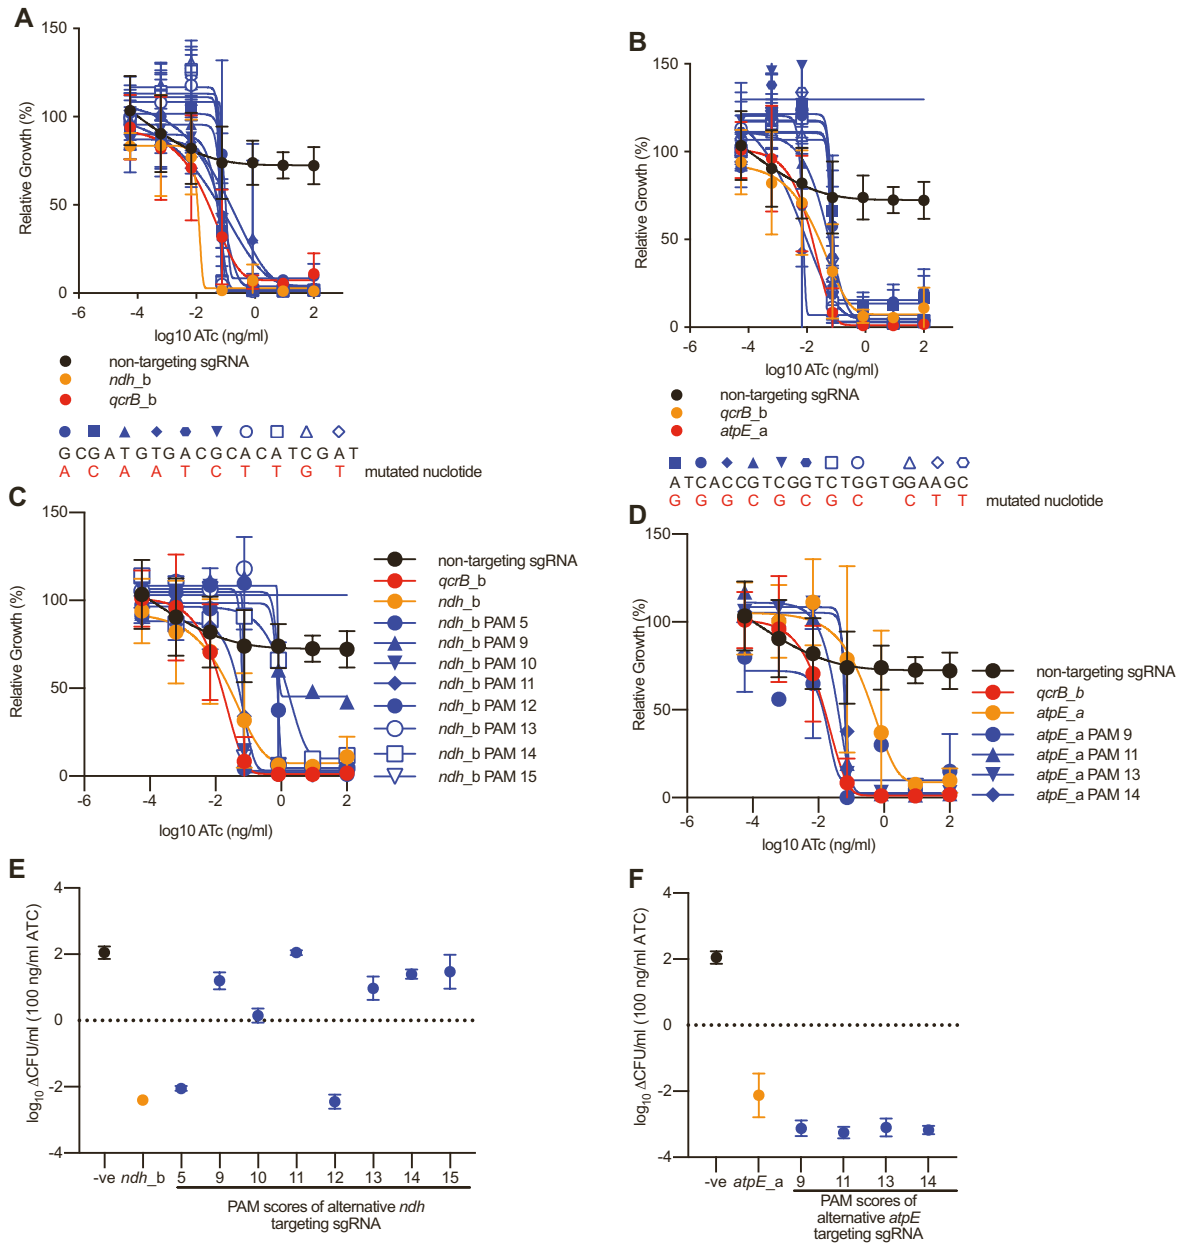

54

55 **Figure S8| Phenotypes of alternative PAM variants of sgRNAs targeting *ndh* and**

56 ***atpE*, related to figure 2: (A-D) Growth of *M. smegmatis* strains expressing either (A)**

57 ***ndh\_b* mis-matched sgRNAs, (B) *atpE\_a* mis-matched sgRNAs, (C) sgRNAs targeting**

58 ***ndh* with weaker PAM variants or (D) sgRNAs targeting *atpE* with weaker PAM**

59 **variants in the presence of increasing concentrations of ATc. Growth is expressed**

60 **relative to a no ATc control. PAM score is based on previous studies that identified 15**

61 **permissible non-canonical PAM variants that retained inhibitory phenotype. (E-F)**

62 Reduction in CFU/ml (CFU/ml at 0 hrs -26hrs) in the presence of 100 ng/ml ATc. For  
63 *M. smegmatis* strains expressing sgRNAs targeting *ndh* or *atpE* with weaker PAM  
64 variants. Results for A-F are the mean  $\pm$  SD of four biological replicates. For all  
65 experiments included a negative non-targeting and a parental bactericidal sgRNA (i.e.  
66 *ndh\_b* or *atpE\_a*)

67

68

69  
70

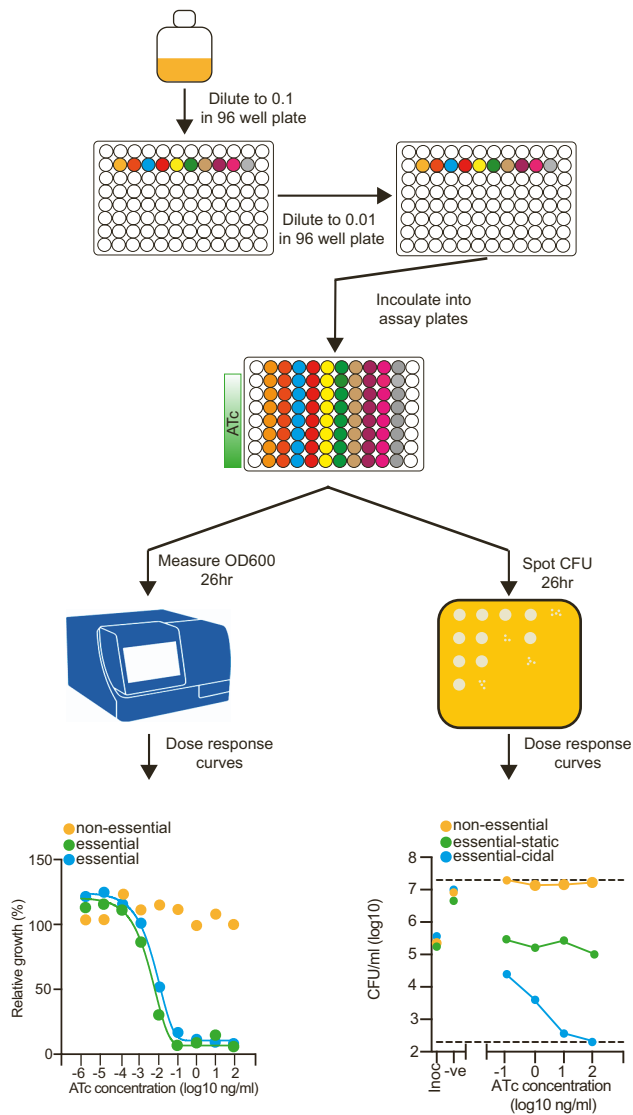

71  
72

73 **Figure S9| Workflow for bacterial phenotyping screens of single and multiplex**  
74 **sgRNAs, related to figure 1.** Work flow for phenotypic assays, with specific details  
75 in materials and methods.

| plasmid name | Target-Species | Target-Gene | sgRNA name          | Target sequence (Coding (5'-3')) | PAM (non coding 5'-3', NN.....) | PAM Score (Rock et al) | sgRNA target length | Fwd Oligo (5-3') (GGGA_)     | Oligo Rev Sequence (AAAC_)     |
|--------------|----------------|-------------|---------------------|----------------------------------|---------------------------------|------------------------|---------------------|------------------------------|--------------------------------|
| pJLR962      | M. smegmatis   |             | non-targeting sgRNA | CGAGACGCATTAATCG TCTCC           |                                 |                        |                     | GGGAGGAGACGATT AATGCGTCTCG   | AAACCGAGACGCAT TAATCGTCTCC     |
| pCi2         | M. smegmatis   | MSMEG_0250  | <i>mmpL3</i>        | GACGAGGGCAGCCAG TCTGTCCG         | GTAGAAA                         |                        |                     | GGGAGCGACAGACT GGCTGCCCTCGTC | AAACGACGAGGGCA GCCAGTCTGTCCG   |
| pCi3         | M. smegmatis   | MSMEG_0418  | <i>sdhA1_a</i>      | GCGACGAGGTGGCCC GCGCC            | GGGGAAG                         |                        |                     | GGGAGGCGCGGGC CACCTCGTCGC    | AAACGCGACGAGGT GGCCCGCGCC      |
| pCi4         | M. smegmatis   | MSMEG_1670  | <i>sdhA2_a</i>      | AGGCCAAGCTGCCCC ACATC            | CGAGAAC                         | 5                      | 20                  | GGGAGATGTCGGG CAGCTTGCCCT    | AAACAGGCCAAGCT GCCCGACATC      |
| pCi21        | M. smegmatis   | MSMEG_1670  | <i>sdhA2_c</i>      | AGACGCTGTACCAAAA CTGC            | GCAGGAT                         | 9                      | 20                  | GGGAGCAGTTTTGG TACAGCGTCT    | AAACAGACGCTGTA CCAAACCTGC      |
| pCi46        | M. smegmatis   | MSMEG_2060  | <i>nuoD_a</i>       | AGATCGAGGGCGAGA TCATC            | CCAGGAT                         | 9                      | 20                  | GGGAGATGATCTCG CCCTCGATCT    | AAACAGATCGAGGG CGAGATCATC      |
| pCi47        | M. smegmatis   | MSMEG_2060  | <i>nuoD_b</i>       | GAACCGGAGGATC CTGCGGGT           | ACGGAAG                         | 4                      | 23                  | GGGAACCCGACAG ATCTCCTCGCGTTC | AAACGAACGCGAGG AGATCCTGCGGGT   |
| pCi48        | M. smegmatis   | MSMEG_3621  | <i>ndh_a</i>        | CCGCTGCTTACCAG GTGGC             | CTGGAAG                         | 4                      | 20                  | GGGAGCCACCTGGT AGAGCAGCGG    | AAACCCGCTGCTCT ACCAGGTGGC      |
| pCi49        | M. smegmatis   | MSMEG_3621  | <i>ndh_b</i>        | GCGATGTGACGCACA TCGAT            | CGAGAAC                         | 1                      | 20                  | GGGAATCGATGTGC GTCACATCGC    | AAACGCGATGTGAC GCACATCGAT      |
| pCi50        | M. smegmatis   | MSMEG_4263  | <i>qcrB_a</i>       | CTGGGTGAGATCGCG CTGTAC           | CAGGAAG                         | 4                      | 21                  | GGGAGTACAGCGC GATCTCACCCAG   | AAACCTGGGTGAGA TCGCGCTGTAC     |
| pCi51        | M. smegmatis   | MSMEG_4263  | <i>qcrB_b</i>       | GATCCGTGATGGCA CAGT              | GAAGAAC                         | 5                      | 20                  | GGGAACGTGTGCCA TCGACGGATC    | AAACGATCCGTGCA TGGCACAGT       |
| pCi52        | M. smegmatis   | MSMEG_4268  | <i>ctaC_a</i>       | GATTGCGTCGTTCCG CGTGGGT          | ACGGAAC                         | 11                     | 22                  | GGGAACCCACGGC GAACGACGCAATC  | AAACGATTGCGTCCG TTCGCCGTGGGT   |
| pCi53        | M. smegmatis   | MSMEG_4268  | <i>ctaC_b</i>       | TTCACCGTCGTCGTGC AGGAAC          | GTAGAAC                         | 5                      | 22                  | GGGAGTTCCTGCAC GACGACGGTGAA  | AAACTTCACCGTCCG TCGTGCAGGAAC   |
| pCi54        | M. smegmatis   | MSMEG_4941  | <i>atpE_a</i>       | ATCACCGTCGGTCTG GTGGAAGC         | GAAGAAC                         | 5                      | 23                  | GGGAGCTTCCACCA GACCGACGGTGAT | AAACATCACCGTCCG GTCTGGTGGGAAGC |
| pCi55        | M. smegmatis   | MSMEG_4942  | <i>atpB_a</i>       | CCACTGCCGTACCCG CCGTGAT          | CGAGAAT                         | 2                      | 22                  | GGGAATCACGGCG GTGACGGCAGTGG  | AAACCCACTGCCGT CACCGCCGTGAT    |
| pCi56        | M. smegmatis   | MSMEG_4942  | <i>atpB_b</i>       | CTGCGGGCCAAGGTC ACCTC            | GTAGAAC                         | 1                      | 20                  | GGGAGAGGTGACCT TGGCCCGCAG    | AAACCTGCGGGCCA AGGTACCTC       |
| pCi59        | M. smegmatis   | MSMEG_2613  | <i>mqo_a</i>        | GCCCACGCCGTCGAG AACGGT           | CCAGAAC                         | 5                      | 21                  | GGGAACCGTTCTCG ACGGCGTGGGC   | AAACGCCACGCCG TCGAGAACGGT      |
| pCi60        | M. smegmatis   | MSMEG_2613  | <i>mqo_b</i>        | AACCTGTGCCGCAT GTGAGT            | GAGGAAG                         | 4                      | 21                  | GGGAACCTCACATGC GGCACAGGGTT  | AAACAAACCTGTGC CGCATGTGAGT     |
| pCi65        | M. smegmatis   | MSMEG_3232  | <i>cydB_a</i>       | CTGCTGGAGGGCTTC GACTT            | GAAGAAC                         | 1                      | 20                  | GGGAAAGTCGAAGC CCTCCAGCAG    | AAACCTGTGGAGG GCTTCGACTT       |

|        |              |            |                   |                              |         |    |    |                                 |                                 |
|--------|--------------|------------|-------------------|------------------------------|---------|----|----|---------------------------------|---------------------------------|
| pCi66  | M. smegmatis | MSMEG_3232 | <i>cydB_b</i>     | GGCCGTGCCGCCGAG<br>AAACGC    | GAAGAAC | 5  | 21 | GGGAGCGTTTCTCG<br>GCGGCACGGCC   | AAACGGCCGTGCCG<br>CCGAGAAACGC   |
| pCi67  | M. smegmatis | MSMEG_1109 | <i>menD_a</i>     | TGATCGTGTGAGCG<br>CCAAC      | GCGGAAC | 11 | 20 | GGGAGTTGGCGCTC<br>AGCACGATCA    | AAACTGATCGTGCT<br>GAGCGCCAAC    |
| pCi68  | M. smegmatis | MSMEG_1109 | <i>menD_b</i>     | GCACGGGCGCCAACC<br>AGACC     | CGAGCAT | 7  | 20 | GGGAGGTCTGGTTG<br>GCGCCCGTGC    | AAACGCACGGGCGC<br>CAACCAGACC    |
| pCi266 | M. smegmatis | MSMEG_3621 | <i>ndh_b_1MM</i>  | ACGATGTGACGCACAT<br>CGAT     | CGAGAAG | 1  | 20 | GGGAATCGATGTGC<br>GTCACATCGT    | AAACACGATGTGAC<br>GCACATCGAT    |
| pCi267 | M. smegmatis | MSMEG_3621 | <i>ndh_b_3MM</i>  | GCCATGTGACGCACA<br>TCGAT     | CGAGAAG | 1  | 20 | GGGAATCGATGTGC<br>GTCACATGGC    | AAACGCCATGTGAC<br>GCACATCGAT    |
| pCi268 | M. smegmatis | MSMEG_3621 | <i>ndh_b_5MM</i>  | GCGAAGTGACGCACA<br>TCGAT     | CGAGAAG | 1  | 20 | GGGAATCGATGTGC<br>GTCACTTCGC    | AAACGCGAAGTGAC<br>GCACATCGAT    |
| pCi269 | M. smegmatis | MSMEG_3621 | <i>ndh_b_7MM</i>  | GCGATGAGACGCACA<br>TCGAT     | CGAGAAG | 1  | 20 | GGGAATCGATGTGC<br>GTCTCATCGC    | AAACGCGATGAGAC<br>GCACATCGAT    |
| pCi270 | M. smegmatis | MSMEG_3621 | <i>ndh_b_9MM</i>  | GCGATGTGTGCGACA<br>TCGAT     | CGAGAAG | 1  | 20 | GGGAATCGATGTGC<br>GACACATCGC    | AAACGCGATGTGTC<br>GCACATCGAT    |
| pCi271 | M. smegmatis | MSMEG_3621 | <i>ndh_b_11MM</i> | GCGATGTGACCCACA<br>TCGAT     | CGAGAAG | 1  | 20 | GGGAATCGATGTGG<br>GTCACATCGC    | AAACGCGATGTGAC<br>CCACATCGAT    |
| pCi272 | M. smegmatis | MSMEG_3621 | <i>ndh_b_13MM</i> | GCGATGTGACGCTCA<br>TCGAT     | CGAGAAG | 1  | 20 | GGGAATCGATGAGC<br>GTCACATCGC    | AAACGCGATGTGAC<br>GCTCATCGAT    |
| pCi273 | M. smegmatis | MSMEG_3621 | <i>ndh_b_15MM</i> | GCGATGTGACGCACT<br>TCGAT     | CGAGAAG | 1  | 20 | GGGAATCGAAGTGC<br>GTCACATCGC    | AAACGCGATGTGAC<br>GCACTTCGAT    |
| pCi274 | M. smegmatis | MSMEG_3621 | <i>ndh_b_17MM</i> | GCGATGTGACGCACA<br>TGGAT     | CGAGAAG | 1  | 20 | GGGAATCCATGTGC<br>GTCACATCGC    | AAACGCGATGTGAC<br>GCACATGGAT    |
| pCi275 | M. smegmatis | MSMEG_3621 | <i>ndh_b_19MM</i> | GCGATGTGACGCACA<br>TCGTT     | CGAGAAG | 1  | 20 | GGGAAACGATGTGC<br>GTCACATCGC    | AAACGCGATGTGAC<br>GCACATCGTT    |
| pCi276 | M. smegmatis | MSMEG_3621 | <i>ndh_m</i>      | CGGGACCATCCGTGC<br>CATCGAGT  | TCGGAAT | 12 | 23 | GGGAATCGATGCG<br>ACGGATGGTCCCG  | AAACCGGGACCATC<br>CGTCGCATCGAGT |
| pCi277 | M. smegmatis | MSMEG_3621 | <i>ndh_n</i>      | CGTTCACCGTCGTGC<br>GCGCGGGC  | TCAGCAA | 10 | 23 | GGGAGCCCGCGCC<br>GACGACGGTGAACG | AAACCGTTCACCGT<br>CGTCGGCGCGGGC |
| pCi278 | M. smegmatis | MSMEG_3621 | <i>ndh_o</i>      | GCAAGCAGAAGAACG<br>CCCAGGT   | GGAGGAT | 9  | 22 | GGGAACCTGGGCGT<br>TCTTCTGCTTGC  | AAACGCAAGCAGAA<br>GAACGCCAGGT   |
| pCi279 | M. smegmatis | MSMEG_3621 | <i>ndh_p</i>      | TTCGGCAACGACCACT<br>TCGC     | GTAGGAC | 15 | 20 | GGGAGCGAAGTGGT<br>CGTTGCCGAA    | AAACTTCGGCAACG<br>ACCACTTCGC    |
| pCi280 | M. smegmatis | MSMEG_3621 | <i>ndh_q</i>      | GCGGTGGCCAAGGTG<br>GGTCC     | GGAGAAC | 5  | 20 | GGGAGGACCCACCT<br>TGGCCACCGC    | AAACGCGGTGGCCA<br>AGGTGGGTCC    |
| pCi281 | M. smegmatis | MSMEG_3621 | <i>ndh_r</i>      | GTCACACCTACTCGAC<br>GCCC     | CGAGCAG | 13 | 20 | GGGAGGGCGTCSGA<br>GTAGGTGTGAC   | AAACGTCACACCTA<br>CTCGACGCC     |
| pCi282 | M. smegmatis | MSMEG_3621 | <i>ndh_s</i>      | GCACCAAGCGTGGTC<br>AGCTC     | TCAGGAA | 14 | 20 | GGGAGAGCTGACCA<br>CGCTTGGTGC    | AAACGCACCAAGCG<br>TGCTCAGCTC    |
| pCi283 | M. smegmatis | MSMEG_3621 | <i>ndh_t</i>      | AGCACCAAGCGTGGT<br>CAGT      | CAGGAAC | 11 | 20 | GGGAAGCTGACCAC<br>GCTTGGTGCT    | AAACAGCACCAAGC<br>GTGGTCAGCT    |
| pCi284 | M. smegmatis | MSMEG_4941 | <i>atpE_a_1MM</i> | GTCACCGTCCGGTCTG<br>GTGGAAGC | GAAGAAC | 5  | 23 | GGGAGCTTCCACCA<br>GACCGACGGTGAC | AAACGTCACCGTCCG<br>GTCTGGTGAAGC |
| pCi285 | M. smegmatis | MSMEG_4941 | <i>atpE_a_3MM</i> | ATGACCGTCCGGTCTG<br>GTGGAAGC | GAAGAAC | 5  | 23 | GGGAGCTTCCACCA<br>GACCGACGGTCAT | AAACATGACCGTCCG<br>GTCTGGTGAAGC |

|        |              |            |                    |                               |         |    |    |                                  |                                   |
|--------|--------------|------------|--------------------|-------------------------------|---------|----|----|----------------------------------|-----------------------------------|
| pCi286 | M. smegmatis | MSMEG_4941 | <i>atpE_a_5MM</i>  | ATCAGCGTCTGGTCTG<br>GTGGAAGC  | GAAGAAC | 5  | 23 | GGGAGCTTCCACCA<br>GACCGACGCTGAT  | AAACATCAGCGTCTG<br>GTCTGGTGGAAAGC |
| pCi287 | M. smegmatis | MSMEG_4941 | <i>atpE_a_7MM</i>  | ATCACCTCGGTCTG<br>GTGGAAGC    | GAAGAAC | 5  | 23 | GGGAGCTTCCACCA<br>GACCGAGGGTGAT  | AAACATCACCCCTCG<br>GTCTGGTGGAAAGC |
| pCi288 | M. smegmatis | MSMEG_4941 | <i>atpE_a_9MM</i>  | ATCACCGTGGTCTG<br>GTGGAAGC    | GAAGAAC | 5  | 23 | GGGAGCTTCCACCA<br>GACCCACGGTGAT  | AAACATCACCGTGG<br>GTCTGGTGGAAAGC  |
| pCi289 | M. smegmatis | MSMEG_4941 | <i>atpE_a_11MM</i> | ATCACCGTCTGCTG<br>GTGGAAGC    | GAAGAAC | 5  | 23 | GGGAGCTTCCACCA<br>GAGCGACGGTGAT  | AAACATGAGCGTCTG<br>GTCTGGTGGAAAGC |
| pCi290 | M. smegmatis | MSMEG_4941 | <i>atpE_a_13MM</i> | ATCACCGTCGGTGTG<br>GTGGAAGC   | GAAGAAC | 5  | 23 | GGGAGCTTCCACCA<br>CACCGACGGTGAT  | AAACATCACCGTCTG<br>GTGTGGTGGAAAGC |
| pCi291 | M. smegmatis | MSMEG_4941 | <i>atpE_a_15MM</i> | ATCACCGTCGGTCTC<br>GTGGAAGC   | GAAGAAC | 5  | 23 | GGGAGCTTCCACCA<br>GACCGACGGTGAT  | AAACATCACCGTCTG<br>GTCTCGTGGAAAGC |
| pCi292 | M. smegmatis | MSMEG_4941 | <i>atpE_a_17MM</i> | ATCACCGTCGGTCTG<br>GAGGAAGC   | GAAGAAC | 5  | 23 | GGGAGCTTCTCCA<br>GACCGACGGTGAT   | AAACATCACCGTCTG<br>GTCTGGAGGAAGC  |
| pCi293 | M. smegmatis | MSMEG_4941 | <i>atpE_a_19MM</i> | ATCACCGTCGGTCTG<br>GTGCAAGC   | GAAGAAC | 5  | 23 | GGGAGCTTGCACCA<br>GACCGACGGTGAT  | AAACATCACCGTCTG<br>GTCTGGTGAAGC   |
| pCi294 | M. smegmatis | MSMEG_4941 | <i>atpE_a_21MM</i> | ATCACCGTCGGTCTG<br>GTGGATGC   | GAAGAAC | 5  | 23 | GGGAGCATCCACCA<br>GACCGACGGTGAT  | AAACATCACCGTCTG<br>GTCTGGTGGATGC  |
| pCi295 | M. smegmatis | MSMEG_4941 | <i>atpE_a_23MM</i> | ATCACCGTCGGTCTG<br>GTGGAAGT   | GAAGAAC | 5  | 23 | GGGAACTTCCACCA<br>GACCGACGGTGAT  | AAACATCACCGTCTG<br>GTCTGGTGGAAAGT |
| pCi296 | M. smegmatis | MSMEG_4942 | <i>atpB_n</i>      | CGCCGATCAACATCGT<br>CGAAGAAGC | CGAGGAA | 14 | 24 | GGGAGTTCTTCGAC<br>GATGTTGATCGGCG | AAACCGCGGATCAA<br>CATCGTCGAAGAAGC |
| pCi297 | M. smegmatis | MSMEG_4942 | <i>atpB_o</i>      | CACGCGGCAGGCATC<br>TGGCGT     | GTAGCAG | 13 | 21 | GGGAACGCCAGATG<br>CCTGCCGCGTG    | AAACCGCGGCGAG<br>GCATCTGGCGT      |
| pCi298 | M. smegmatis | MSMEG_4942 | <i>atpB_p</i>      | TGGTACATCCAGTGGT<br>TCCC      | GGGGAAC | 11 | 20 | GGGAGGGAACCACT<br>GGATGTACCA     | AAACTGGTACATCC<br>AGTGGTTCCC      |
| pCi299 | M. smegmatis | MSMEG_4942 | <i>atpB_q</i>      | TCTCCAAGTGGCTCGC<br>GGTGC     | TCAGGAT | 9  | 21 | GGGAGCACCGCGA<br>GCCAGTTGGAGA    | AAACTCTCCAAGT<br>GCTCGCGGTGC      |

| <b>Table S2: Oligos Used in This Study</b> |                                               |                                            |
|--------------------------------------------|-----------------------------------------------|--------------------------------------------|
| <b>Name-<br/>MMO</b>                       | <b>Sequence</b>                               | <b>Description</b>                         |
| MMO117                                     | TGCGGCGCTTTTTTTTTTGAATTC                      | Sequencing pJR962                          |
| MMO119                                     | CTGCGTTATCCCCTGATTCTG                         | Sequencing pJR962                          |
| MMO120                                     | AATATGCTCTTCAGGATCTGACCAGGGAAAATAGCC          | Fwd primer-Cloning into SapI site pJR962/5 |
| MMO121                                     | TTTATGCTCTTCACTGAAAAAAAAAACACCCTGCCATAAAATGAC | Rev primer-Cloning into SapI site pJR962/5 |
| MMO202                                     | GCCTGGCCATCATGGGTATC                          | Msm_gDNA_check_F1                          |
| MMO203                                     | GGAGGATCCGGAGACCAAGC                          | Msm_gDNA_check_R1                          |
| MMO206                                     | CCTCCGTCTTTTCGGCAACA                          | qPCR-AtpB-MSMEG4942                        |
| MMO207                                     | GTCGAAGGTCTTCCACACGG                          | qPCR-AtpB-MSMEG4942                        |
| MMO208                                     | CTGATCTCGGGTATCGCCC                           | qPCR-AtpE-MSMEG4941                        |
| MMO209                                     | GCCAGGTTGATGAAGTACGC                          | qPCR-AtpE-MSMEG4941                        |
| MMO212                                     | GAGTTCGTCCTGAACTCGGC                          | qPCR-CtaC-MSMEG4268                        |
| MMO213                                     | TGTCCGAGTTGTTGGCCTTC                          | qPCR-CtaC-MSMEG4268                        |
| MMO214                                     | GCCTGACGATCTACAACGGA                          | qPCR-CydB-MSMEG3232                        |
| MMO215                                     | GAGATGCGCTTGCTGAACAC                          | qPCR-CydB-MSMEG3232                        |
| MMO216                                     | TCATAGGCGACCTGACGTTT                          | qPCR-MenD-MSMEG1109                        |
| MMO217                                     | TTGTCGTTGGACACCACGAT                          | qPCR-MenD-MSMEG1109                        |
| MMO218                                     | GGTGGGTCTGCTCAAGTACC                          | qPCR-Mqo-MSMEG2613                         |
| MMO219                                     | GCGAATTCACGAAGCGTCTC                          | qPCR-Mqo-MSMEG2613                         |
| MMO220                                     | TACGCCGCGAAGATCATCAA                          | qPCR-Ndh-MSMEG3621                         |
| MMO221                                     | TGTGGAAGTACTCGAACGGC                          | qPCR-Ndh-MSMEG3621                         |
| MMO222                                     | CGAGCACATCGCCAAGATCA                          | qPCR-nuoD-MSMEG2060                        |
| MMO223                                     | CCTTCGGTGACGAGCTTGAA                          | qPCR-nuoD-MSMEG2060                        |
| MMO226                                     | TATCGGCATGGTGGTACTGC                          | qPCR-qcrB-MSMEG4263                        |
| MMO227                                     | GAAGTCGCTTGATGATGCCG                          | qPCR-qcrB-MSMEG4263                        |
| MMO228                                     | CGTCATGGGTGGTATCGAGG                          | qPCR-sdhA1-MSMEG0418                       |
| MMO229                                     | AGATCTGACAGCGAGTTGCC                          | qPCR-sdhA1-MSMEG0418                       |
| MMO230                                     | ACAACACCAACGTCATCCCC                          | qPCR-sdhA2-MSMEG1670                       |
| MMO231                                     | TGATGTCCAGCAGCGAGTTG                          | qPCR-sdhA2-MSMEG1670                       |
| MMO270                                     | TGTGGGACGAGGAAGAGTCC                          | sigA_Msmeg_Fwd qPCR primer_set 1           |

|        |                      |                                  |
|--------|----------------------|----------------------------------|
| MMO271 | CACCTCTTCTTCGGCGTTGA | sigA_Msmeg_Rev qPCR primer_set 1 |
| MMO300 | GACTCTTCCTCGTCCCACAC | sigA_Msmeg_Fwd qPCR primer_set 2 |
| MMO301 | GAAGACACCGACCTGGAAC  | sigA_Msmeg_Rev qPCR primer_set 2 |

79

80



| <b>Table S3: Golden gate cloning protocols</b>          |                                   |              |
|---------------------------------------------------------|-----------------------------------|--------------|
| <b><i>Oligo annealing protocol</i></b>                  |                                   |              |
| <b>Component</b>                                        | <b>Volume</b>                     |              |
| Oligo Fwd (100 $\mu$ M)                                 | 10 $\mu$ l                        |              |
| Oligo Rev (100 $\mu$ M)                                 | 10 $\mu$ l                        |              |
| H2O                                                     | 25 $\mu$ l                        |              |
| 10x T4 ligase buffer                                    | 5 $\mu$ l                         |              |
| <b>Temperature (<math>^{\circ}</math>C)</b>             | <b>Duration</b>                   |              |
| 95                                                      | 5                                 |              |
| 25 (0.1 $^{\circ}$ C/sec)                               | Time to ramp                      |              |
| 4                                                       | forever                           |              |
| <b><i>sgRNA module golden gate cloning protocol</i></b> |                                   |              |
| <b>Component</b>                                        | <b>Volume (<math>\mu</math>l)</b> |              |
| 10 $\times$ T4 Ligase Buffer                            | 1                                 |              |
| Single sgRNA expression plasmid uncut (20 ng/ $\mu$ L)  | 1.25                              |              |
| Annealed oligo                                          | 2.5                               |              |
| BsmB1 (10,000u/ml)                                      | 0.5                               |              |
| T4 DNA Ligase                                           | 0.5                               |              |
| mQ                                                      | 4.25                              |              |
| <b>Temperature (<math>^{\circ}</math>C)</b>             | <b>Duration</b>                   | <b>Cycle</b> |
| 42 (digestion)                                          | 5 min                             | 30           |
| 16 (ligation)                                           | 5 min                             |              |
| 4                                                       | Forever                           | 1            |
| <b><i>Multiplex golden gate cloning protocol</i></b>    |                                   |              |
| <b>Component</b>                                        | <b>Volume (<math>\mu</math>l)</b> |              |
| 10 $\times$ T4 Ligase Buffer                            | 1                                 |              |
| Single sgRNA expression plasmid uncut (20 ng/ $\mu$ L)  | 1.25                              |              |
| Cloned and purified target -promoter-sgRNA-scaffold     | 2.5                               |              |
| Sap1 (10,000u/ml)                                       | 0.5                               |              |
| T4 DNA Ligase                                           | 0.5                               |              |
| mQ                                                      | 4.25                              |              |
| <b>Temperature (<math>^{\circ}</math>C)</b>             | <b>Duration</b>                   | <b>Cycle</b> |
| 37 (digestion)                                          | 5 min                             | 30           |
| 16 (ligation)                                           | 5 min                             |              |
| 4                                                       | Forever                           | 1            |

84  
85  
86

| <b>Table S4: Multiplexed Plasmids Constructed in this Study.</b> |                       |                             |                     |                                                |                                                     |                                                     |
|------------------------------------------------------------------|-----------------------|-----------------------------|---------------------|------------------------------------------------|-----------------------------------------------------|-----------------------------------------------------|
| <b>Plasmid name</b>                                              | <b>Target-Species</b> | <b>pCi plasmid backbone</b> | <b>Second sgRNA</b> | <b>Amplification template for second sgRNA</b> | <b>Fwd Primer for amplification of sgRNA module</b> | <b>Rev primer for amplification of sgRNA module</b> |
| pCiMX40                                                          | <i>M. smegmatis</i>   | pCi49( <i>ndh_b</i> )       | <i>sdhA2_a</i>      | pCi4                                           | MMO120                                              | MMO121                                              |
| pCiMX41                                                          | <i>M. smegmatis</i>   | pCi49( <i>ndh_b</i> )       | <i>qcrB_b</i>       | pCi51                                          | MMO120                                              | MMO121                                              |
| pCiMX42                                                          | <i>M. smegmatis</i>   | pCi49( <i>ndh_b</i> )       | <i>ctaC_b</i>       | pCi53                                          | MMO120                                              | MMO121                                              |
| pCiMX43                                                          | <i>M. smegmatis</i>   | pCi49( <i>ndh_b</i> )       | <i>atpE_a</i>       | pCi54                                          | MMO120                                              | MMO121                                              |
| pCiMX46                                                          | <i>M. smegmatis</i>   | pCi4( <i>sdhA2_a</i> )      | <i>qcrB_b</i>       | pCi51                                          | MMO120                                              | MMO121                                              |
| pCiMX47                                                          | <i>M. smegmatis</i>   | pCi4( <i>sdhA2_a</i> )      | <i>ctaC_b</i>       | pCi53                                          | MMO120                                              | MMO121                                              |
| pCiMX48                                                          | <i>M. smegmatis</i>   | pCi4( <i>sdhA2_a</i> )      | <i>atpE_a</i>       | pCi54                                          | MMO120                                              | MMO121                                              |
| pCiMX49                                                          | <i>M. smegmatis</i>   | pCi51( <i>qcrB_b</i> )      | <i>ctaC_b</i>       | pCi53                                          | MMO120                                              | MMO121                                              |
| pCiMX50                                                          | <i>M. smegmatis</i>   | pCi51( <i>qcrB_b</i> )      | <i>atpE_a</i>       | pCi54                                          | MMO120                                              | MMO121                                              |
| pCiMX51                                                          | <i>M. smegmatis</i>   | pCi53( <i>ctaC_b</i> )      | <i>atpE_a</i>       | pCi54                                          | MMO120                                              | MMO121                                              |
| pCiMX52                                                          | <i>M. smegmatis</i>   | pCi68( <i>menD_b</i> )      | <i>ndh_b</i>        | pCi49                                          | MMO120                                              | MMO121                                              |
| pCiMX53                                                          | <i>M. smegmatis</i>   | pCi68( <i>menD_b</i> )      | <i>sdhA2_a</i>      | pCi4                                           | MMO120                                              | MMO121                                              |
| pCiMX54                                                          | <i>M. smegmatis</i>   | pCi68( <i>menD_b</i> )      | <i>qcrB_b</i>       | pCi51                                          | MMO120                                              | MMO121                                              |
| pCiMX55                                                          | <i>M. smegmatis</i>   | pCi68( <i>menD_b</i> )      | <i>ctaC_b</i>       | pCi53                                          | MMO120                                              | MMO121                                              |
| pCiMX56                                                          | <i>M. smegmatis</i>   | pCi68( <i>menD_b</i> )      | <i>atpE_a</i>       | pCi54                                          | MMO120                                              | MMO121                                              |
| pCiMX57                                                          | <i>M. smegmatis</i>   | pCi60( <i>mgo_b</i> )       | <i>ndh_b</i>        | pCi49                                          | MMO120                                              | MMO121                                              |
| pCiMX58                                                          | <i>M. smegmatis</i>   | pCi60( <i>mgo_b</i> )       | <i>sdhA2_a</i>      | pCi4                                           | MMO120                                              | MMO121                                              |
| pCiMX59                                                          | <i>M. smegmatis</i>   | pCi60( <i>mgo_b</i> )       | <i>qcrB_b</i>       | pCi51                                          | MMO120                                              | MMO121                                              |
| pCiMX60                                                          | <i>M. smegmatis</i>   | pCi60( <i>mgo_b</i> )       | <i>ctaC_b</i>       | pCi53                                          | MMO120                                              | MMO121                                              |
| pCiMX61                                                          | <i>M. smegmatis</i>   | pCi60( <i>mgo_b</i> )       | <i>atpE_a</i>       | pCi54                                          | MMO120                                              | MMO121                                              |
| pCiMX62                                                          | <i>M. smegmatis</i>   | pCi60( <i>mgo_b</i> )       | <i>menD_b</i>       | pCi68                                          | MMO120                                              | MMO121                                              |
| pCiMX237                                                         | <i>M. smegmatis</i>   | pCi3 ( <i>sdhA1_a</i> )     | <i>ndh_b</i>        | pCi49                                          | MMO120                                              | MMO121                                              |
| pCiMX238                                                         | <i>M. smegmatis</i>   | pCi3 ( <i>sdhA1_a</i> )     | <i>sdhA2_a</i>      | pCi4                                           | MMO120                                              | MMO121                                              |

|          |                     |                         |                  |        |        |        |
|----------|---------------------|-------------------------|------------------|--------|--------|--------|
| pCiMX239 | <i>M. smegmatis</i> | pCi3 ( <i>sdhA1_a</i> ) | <i>qcrB_b</i>    | pCi51  | MMO120 | MMO121 |
| pCiMX240 | <i>M. smegmatis</i> | pCi3 ( <i>sdhA1_a</i> ) | <i>ctaC_b</i>    | pCi53  | MMO120 | MMO121 |
| pCiMX241 | <i>M. smegmatis</i> | pCi3 ( <i>sdhA1_a</i> ) | <i>atpE_a</i>    | pCi54  | MMO120 | MMO121 |
| pCiMX242 | <i>M. smegmatis</i> | pCi3 ( <i>sdhA1_a</i> ) | <i>menD_b</i>    | pCi68  | MMO120 | MMO121 |
| pCiMX243 | <i>M. smegmatis</i> | pCi3 ( <i>sdhA1_a</i> ) | <i>mqo_b</i>     | pCi60  | MMO120 | MMO121 |
| pCiMX244 | <i>M. smegmatis</i> | pCi66 ( <i>cydB_b</i> ) | <i>ndh_b</i>     | pCi49  | MMO120 | MMO121 |
| pCiMX245 | <i>M. smegmatis</i> | pCi66 ( <i>cydB_b</i> ) | <i>sdhA2_a</i>   | pCi4   | MMO120 | MMO121 |
| pCiMX246 | <i>M. smegmatis</i> | pCi66 ( <i>cydB_b</i> ) | <i>qcrB_b</i>    | pCi51  | MMO120 | MMO121 |
| pCiMX247 | <i>M. smegmatis</i> | pCi66 ( <i>cydB_b</i> ) | <i>ctaC_b</i>    | pCi53  | MMO120 | MMO121 |
| pCiMX248 | <i>M. smegmatis</i> | pCi66 ( <i>cydB_b</i> ) | <i>atpE_a</i>    | pCi54  | MMO120 | MMO121 |
| pCiMX249 | <i>M. smegmatis</i> | pCi66 ( <i>cydB_b</i> ) | <i>menD_b</i>    | pCi68  | MMO120 | MMO121 |
| pCiMX250 | <i>M. smegmatis</i> | pCi66 ( <i>cydB_b</i> ) | <i>mqo_b</i>     | pCi60  | MMO120 | MMO121 |
| pCiMX251 | <i>M. smegmatis</i> | pCi66 ( <i>cydB_b</i> ) | <i>sdhA1_a</i>   | pCi3   | MMO120 | MMO121 |
| pCiMX252 | <i>M. smegmatis</i> | pCi46 ( <i>nuoD_a</i> ) | <i>ndh_b</i>     | pCi49  | MMO120 | MMO121 |
| pCiMX253 | <i>M. smegmatis</i> | pCi46 ( <i>nuoD_a</i> ) | <i>sdhA2_a</i>   | pCi4   | MMO120 | MMO121 |
| pCiMX254 | <i>M. smegmatis</i> | pCi46 ( <i>nuoD_a</i> ) | <i>qcrB_b</i>    | pCi51  | MMO120 | MMO121 |
| pCiMX255 | <i>M. smegmatis</i> | pCi46 ( <i>nuoD_a</i> ) | <i>ctaC_b</i>    | pCi53  | MMO120 | MMO121 |
| pCiMX256 | <i>M. smegmatis</i> | pCi46 ( <i>nuoD_a</i> ) | <i>atpE_a</i>    | pCi54  | MMO120 | MMO121 |
| pCiMX257 | <i>M. smegmatis</i> | pCi46 ( <i>nuoD_a</i> ) | <i>menD_b</i>    | pCi68  | MMO120 | MMO121 |
| pCiMX258 | <i>M. smegmatis</i> | pCi46 ( <i>nuoD_a</i> ) | <i>mqo_b</i>     | pCi60  | MMO120 | MMO121 |
| pCiMX259 | <i>M. smegmatis</i> | pCi46 ( <i>nuoD_a</i> ) | <i>sdhA1_a</i>   | pCi3   | MMO120 | MMO121 |
| pCiMX260 | <i>M. smegmatis</i> | pCi46 ( <i>nuoD_a</i> ) | <i>cydB_b</i>    | pCi66  | MMO120 | MMO121 |
| pCiMX262 | <i>M. smegmatis</i> | pCi4 ( <i>sdhA2_a</i> ) | <i>ndh_b_3MM</i> | pCi267 | MMO120 | MMO121 |
| pCiMX263 | <i>M. smegmatis</i> | pCi51 ( <i>qcrB_b</i> ) | <i>ndh_b_3MM</i> | pCi267 | MMO120 | MMO121 |
| pCiMX264 | <i>M. smegmatis</i> | pCi53 ( <i>ctaC_b</i> ) | <i>ndh_b_3MM</i> | pCi267 | MMO120 | MMO121 |
| pCiMX265 | <i>M. smegmatis</i> | pCi54 ( <i>atpE_a</i> ) | <i>ndh_b_3MM</i> | pCi267 | MMO120 | MMO121 |
| pCiMX266 | <i>M. smegmatis</i> | pCi68 ( <i>menD_b</i> ) | <i>ndh_b_3MM</i> | pCi267 | MMO120 | MMO121 |
| pCiMX267 | <i>M. smegmatis</i> | pCi60 ( <i>mqo_b</i> )  | <i>ndh_b_3MM</i> | pCi267 | MMO120 | MMO121 |
| pCiMX268 | <i>M. smegmatis</i> | pCi3 ( <i>sdhA1</i> )   | <i>ndh_b_3MM</i> | pCi267 | MMO120 | MMO121 |
| pCiMX269 | <i>M. smegmatis</i> | pCi66 ( <i>cydB_b</i> ) | <i>ndh_b_3MM</i> | pCi267 | MMO120 | MMO121 |
| pCiMX271 | <i>M. smegmatis</i> | pCi4 ( <i>sdhA2_a</i> ) | <i>ndh_b_5MM</i> | pCi268 | MMO120 | MMO121 |

|          |                     |                              |                    |        |        |        |
|----------|---------------------|------------------------------|--------------------|--------|--------|--------|
| pCiMX272 | <i>M. smegmatis</i> | pCi51 ( <i>qcrB</i> _b)      | <i>ndh</i> _b_5MM  | pCi268 | MMO120 | MMO121 |
| pCiMX273 | <i>M. smegmatis</i> | pCi53( <i>ctaC</i> _b)       | <i>ndh</i> _b_5MM  | pCi268 | MMO120 | MMO121 |
| pCiMX274 | <i>M. smegmatis</i> | pCi54 ( <i>atpE</i> _a)      | <i>ndh</i> _b_5MM  | pCi268 | MMO120 | MMO121 |
| pCiMX275 | <i>M. smegmatis</i> | pCi68( <i>menD</i> _b)       | <i>ndh</i> _b_5MM  | pCi268 | MMO120 | MMO121 |
| pCiMX276 | <i>M. smegmatis</i> | pCi60( <i>mgo</i> _b)        | <i>ndh</i> _b_5MM  | pCi268 | MMO120 | MMO121 |
| pCiMX277 | <i>M. smegmatis</i> | pCi3 ( <i>sdhA1</i> )        | <i>ndh</i> _b_5MM  | pCi268 | MMO120 | MMO121 |
| pCiMX278 | <i>M. smegmatis</i> | pCi66 ( <i>cydB</i> _b)      | <i>ndh</i> _b_5MM  | pCi268 | MMO120 | MMO121 |
| pCiMX279 | <i>M. smegmatis</i> | pCi49 ( <i>ndh</i> _b)       | <i>atpE</i> _a_3MM | pCi285 | MMO120 | MMO121 |
| pCiMX280 | <i>M. smegmatis</i> | pCi4 ( <i>sdhA2</i> _a)      | <i>atpE</i> _a_3MM | pCi285 | MMO120 | MMO121 |
| pCiMX281 | <i>M. smegmatis</i> | pCi51 ( <i>qcrB</i> _b)      | <i>atpE</i> _a_3MM | pCi285 | MMO120 | MMO121 |
| pCiMX282 | <i>M. smegmatis</i> | pCi53 ( <i>ctaC</i> _b)      | <i>atpE</i> _a_3MM | pCi285 | MMO120 | MMO121 |
| pCiMX284 | <i>M. smegmatis</i> | pCi68 ( <i>menD</i> _b)      | <i>atpE</i> _a_3MM | pCi285 | MMO120 | MMO121 |
| pCiMX285 | <i>M. smegmatis</i> | pCi60 ( <i>mgo</i> _b)       | <i>atpE</i> _a_3MM | pCi285 | MMO120 | MMO121 |
| pCiMX286 | <i>M. smegmatis</i> | pCi3 ( <i>sdhA1</i> )        | <i>atpE</i> _a_3MM | pCi285 | MMO120 | MMO121 |
| pCiMX287 | <i>M. smegmatis</i> | pCi66 ( <i>cydB</i> _b)      | <i>atpE</i> _a_3MM | pCi285 | MMO120 | MMO121 |
| pCiMX288 | <i>M. smegmatis</i> | pCi285 ( <i>atpE</i> _a_3MM) | <i>ndh</i> _b_3MM  | pCi267 | MMO120 | MMO121 |
| pCiMX289 | <i>M. smegmatis</i> | pCi285 ( <i>atpE</i> _a_3MM) | <i>ndh</i> _b_5MM  | pCi268 | MMO120 | MMO121 |

87

88
